# Supplementary material for: Multi-shelled ceria hollow spheres with a tunable shell number and thickness and their superior catalytic activity
Source: Royal Society of Chemistry journal article supplement (doi:10.1039/c6dt04402f), 2017-01-01
Supplement: c6dt04402f1.pdf [file c6dt04402f1.pdf]

Electronic supporting information

**Multi-shelled ceria hollow spheres with tunable shell  
number, thickness and their superior catalytic activity**

Yuan-Yuan Liao, Yuan Li, Lei Wang, Yong-Xia Zhao, Dan-Yang Ma, Bi-Qing Wang, Yong-

Xia Wan, Sheng-Liang Zhong\*

---

\*Corresponding author. Tel.: 86-791-88120386; fax: 86-791-88120386.

E-mail address: [slzhong@jxnu.edu.cn](mailto:slzhong@jxnu.edu.cn) (S. L. Zhong)

Table S1 Samples and Corresponding Experimental Parameters.

| Sample | Reaction time (h) | Reaction         |  | Solvent composition  | Molar ratio of Ce <sup>3+</sup> and 2,5-H <sub>2</sub> PDC | Calcination      |
|--------|-------------------|------------------|--|----------------------|------------------------------------------------------------|------------------|
|        |                   | Temperature (°C) |  |                      |                                                            | temperature (°C) |
| 0      | 12                | 200              |  | 16 mL DMF+16 mL EtOH | 1:3                                                        | no calcination   |
| 1      | 12                | 200              |  | 16 mL DMF+16 mL EtOH | 1:3                                                        | 600              |
| 2      | 12                | 80               |  | 16 mL DMF+16 mL EtOH | 1:3                                                        | 600              |
| 3      | 12                | 120              |  | 16 mL DMF+16 mL EtOH | 1:3                                                        | 600              |
| 4      | 12                | 160              |  | 16 mL DMF+16 mL EtOH | 1:3                                                        | 600              |
| 5      | 1                 | 200              |  | 16 mL DMF+16 mL EtOH | 1:3                                                        | 600              |
| 6      | 6                 | 200              |  | 16 mL DMF+16 mL EtOH | 1:3                                                        | 600              |
| 7      | 12                | 200              |  | 28 mL DMF+4 mL EtOH  | 1:3                                                        | 600              |
| 8      | 12                | 200              |  | 24 mL DMF+8 mL EtOH  | 1:3                                                        | 600              |
| 9      | 12                | 200              |  | 8 mL DMF+24 mL EtOH  | 1:3                                                        | 600              |
| 10     | 12                | 200              |  | 32 mL DMF+0 mL EtOH  | 1:3                                                        | 600              |
| 11     | 12                | 200              |  | 16 mL DMF+16 mL EtOH | 1:1                                                        | 600              |
| 12     | 12                | 200              |  | 16 mL DMF+16 mL EtOH | 1:2                                                        | 600              |
| 13     | 12                | 200              |  | 16 mL DMF+16 mL EtOH | 1:4                                                        | 600              |

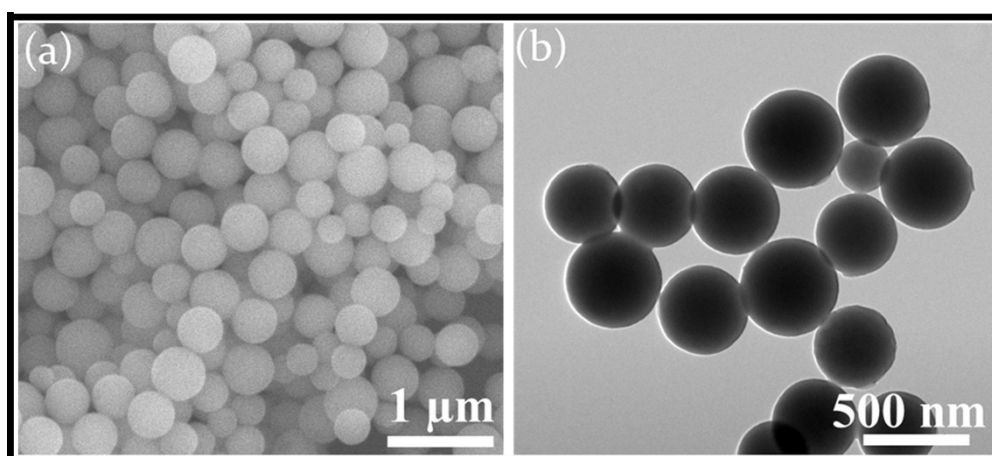

**Fig. S1.** (a, b) SEM and TEM images of sample 0.

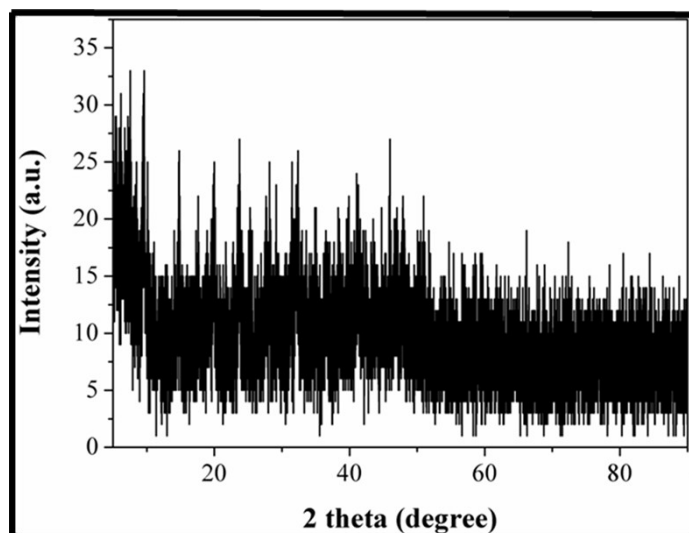

Fig. S2. XRD images of sample 0.

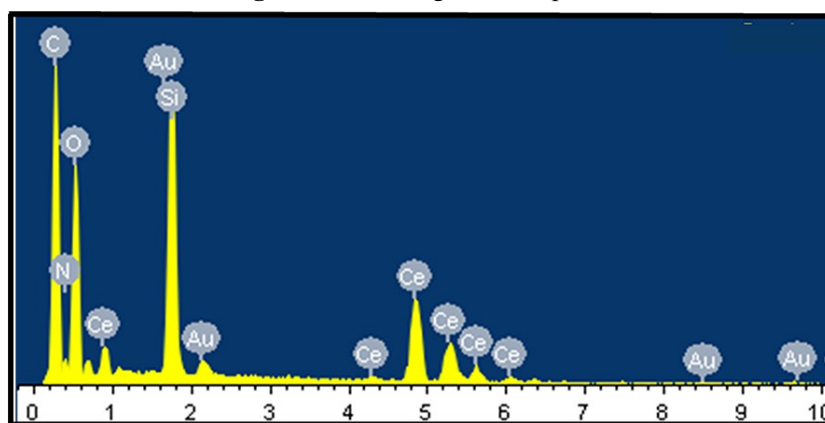

Fig. S3. EDX images of sample 0.

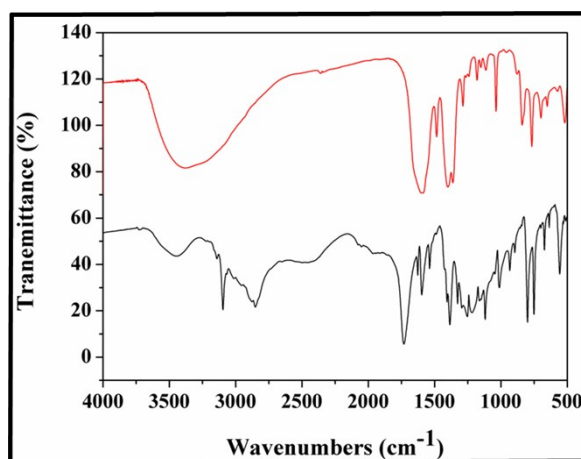

Fig. S4. FTIR spectra of sample 0 (red) and pure 2,5-pyridinedicarboxylic acid (black).

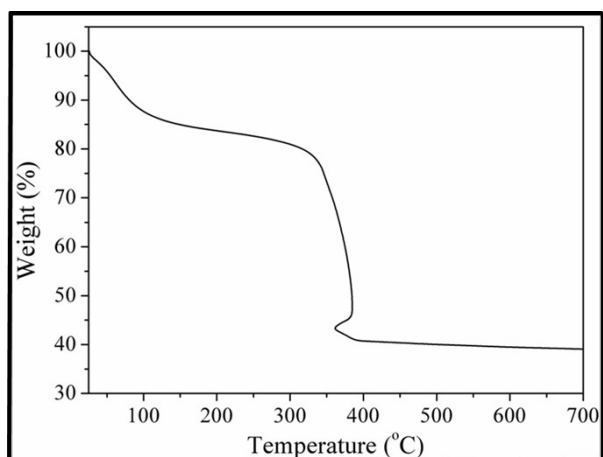

**Fig. S5.** TG curves of sample 0.

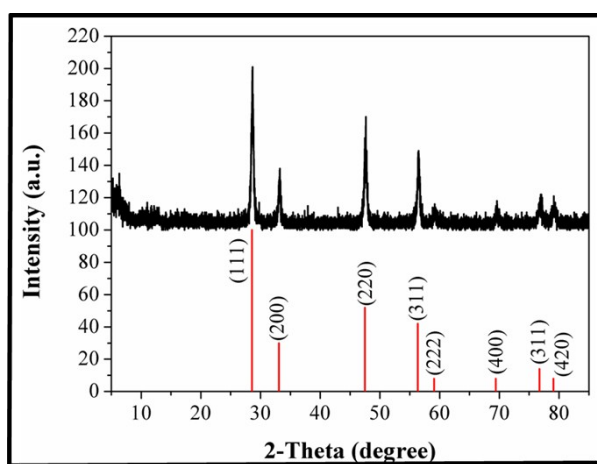

**Fig. S6.** XRD pattern of sample 1, and the red line is the standard data for CeO<sub>2</sub> (JCPDS card 34-0394).

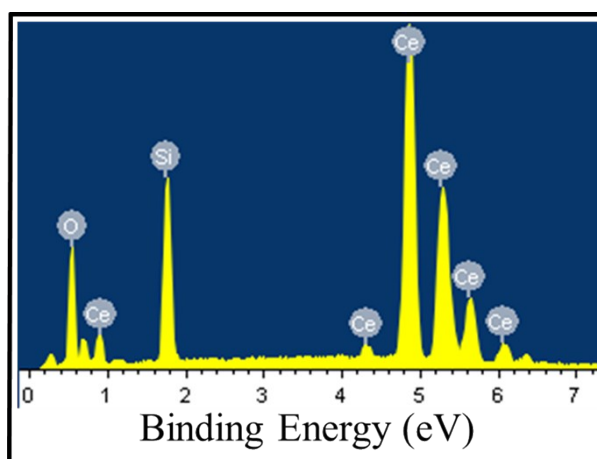

**Fig. S7.** EDX spectrum of sample 1.

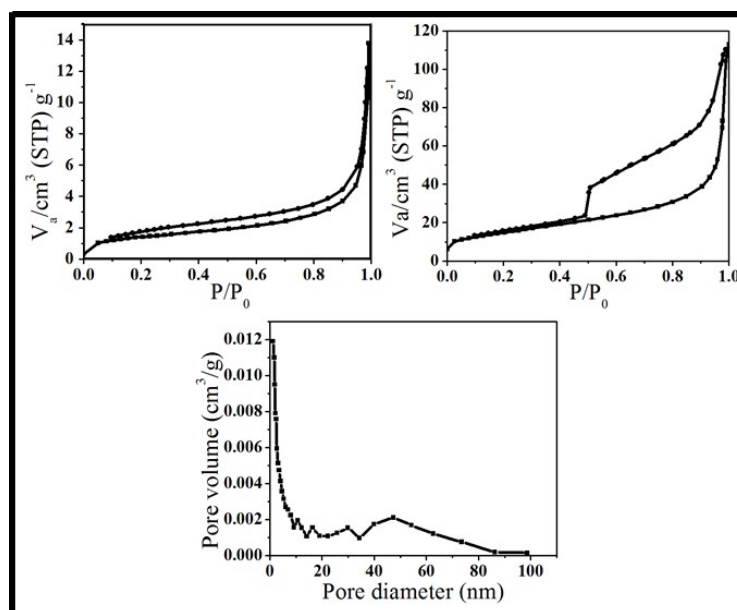

**Fig. S8.** Nitrogen adsorption-desorption isotherms of the as-prepared product. (a) sample **0**, (b) sample **1** and (c) BJH pore size distribution of sample **1**.

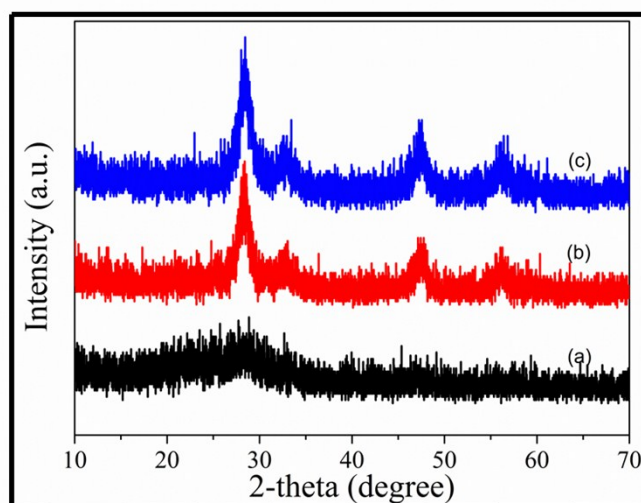

**Fig. S9.** XRD patterns of immediate products obtained by calcining sample **0** at different calcinations stage. (a) 300 °C; (b) 350 °C; (c) 400 °C.

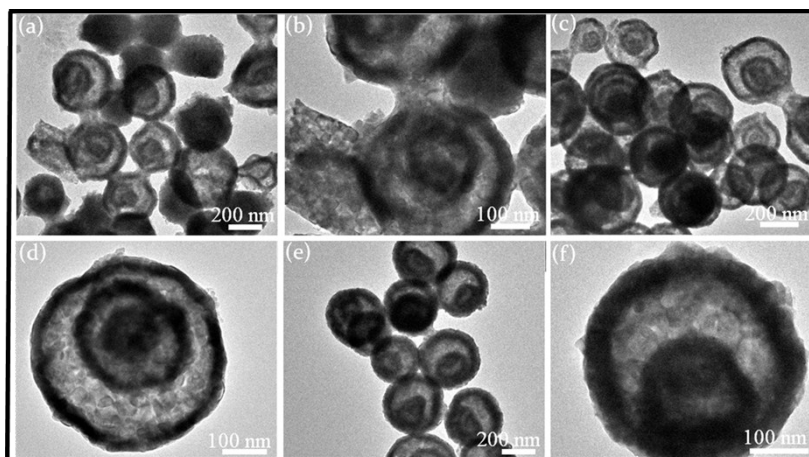

**Fig. S10.** TEM photos of the products obtained after calcining the CPs precursors prepared after different reaction temperature. (a, b) sample **2**; (c, d) sample **3**; (e, f) sample **4**.

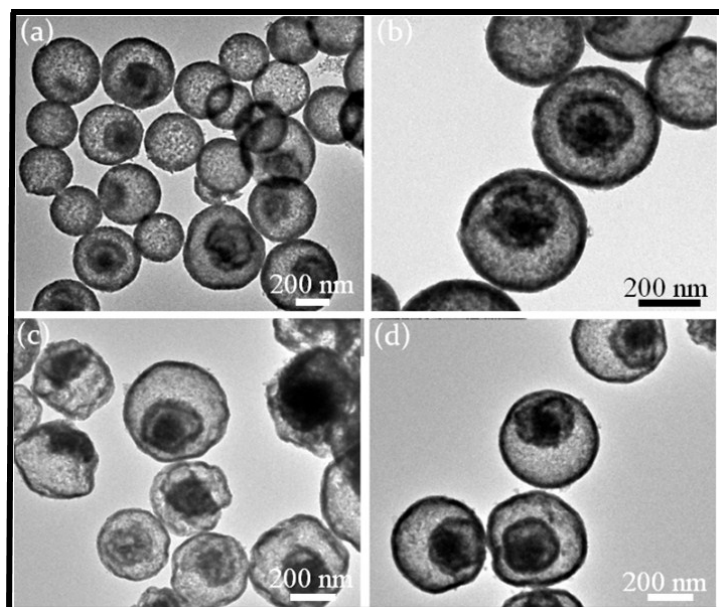

**Fig. S11.** TEM photos of the products obtained after calcining the CPs precursors prepared after different reaction time. (a, b) sample **5**; (c, d) sample **6**.

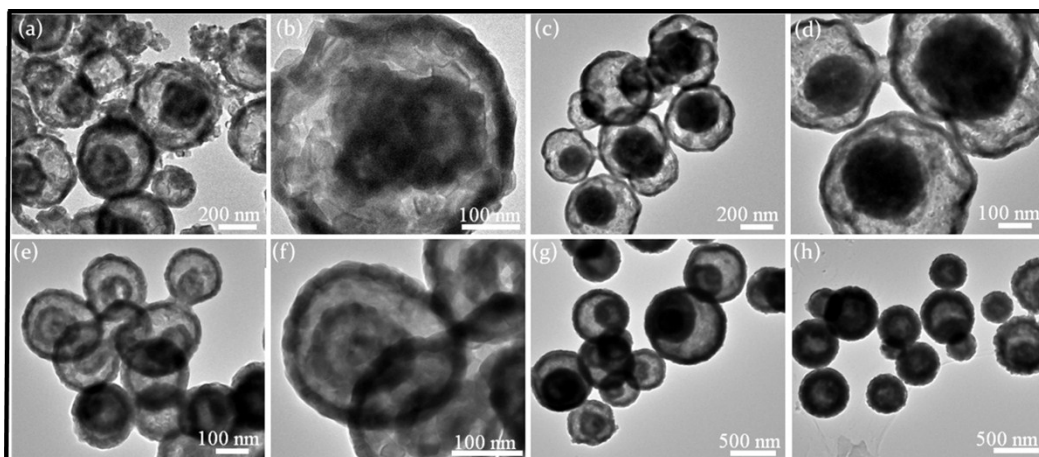

**Fig. S12.** TEM photos of the products obtained by calcining the CP precursors prepared at different solvent compositions. (a, b) sample **7**; (c, d) sample **8**; (e, f) sample **9**; (g, h) sample **10**.

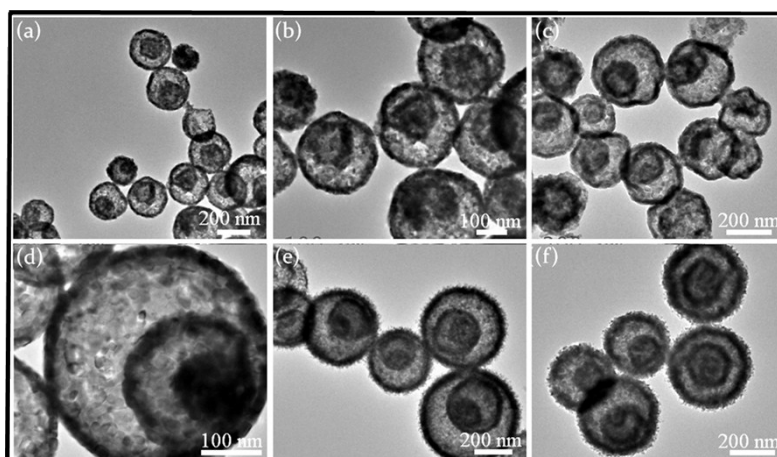

**Fig. S13.** TEM photos of the products obtained by calcining the precursors prepared with different metal-ligand ratios. (a, b) sample **11**; (c, d) sample **12**; (e, f) sample **13**.

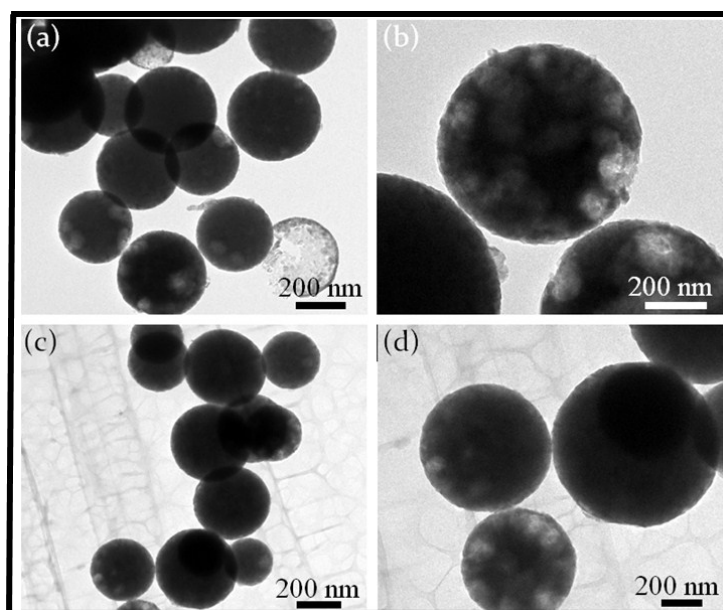

**Fig. S14.** TEM photos of the products obtained by calcining sample **0** at different atmospheres.

(a,b)  $N_2$ ; (c, d) Ar.

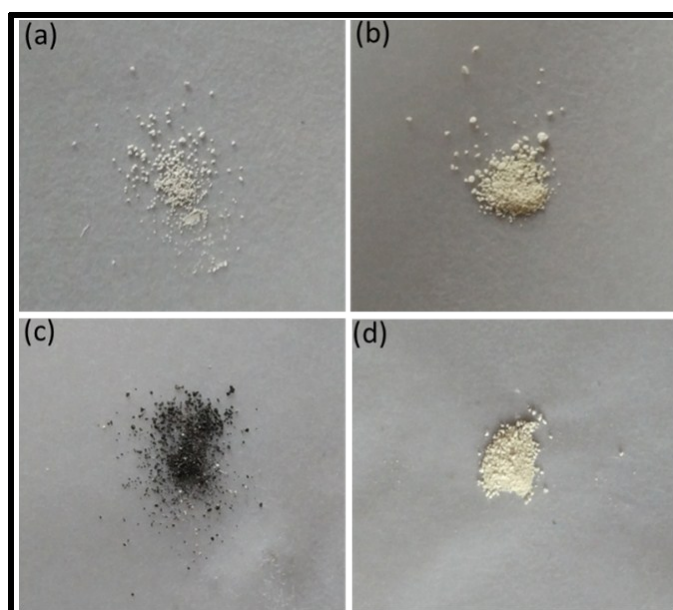

**Fig. S15.** Photos of the products obtained by calcining sample **0** at different atmospheres. (a) $N_2$ ; (b)

calcining (a) at Air; (c)Ar; (d) calcining (c) at Air.

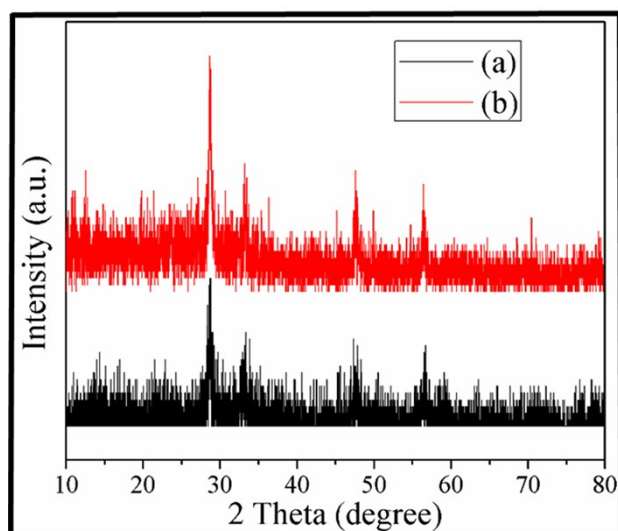

**Fig. S16.** XRD patterns of the products after calcining sample **0** at different atmospheres.

(a)N<sub>2</sub>; (b)Ar.

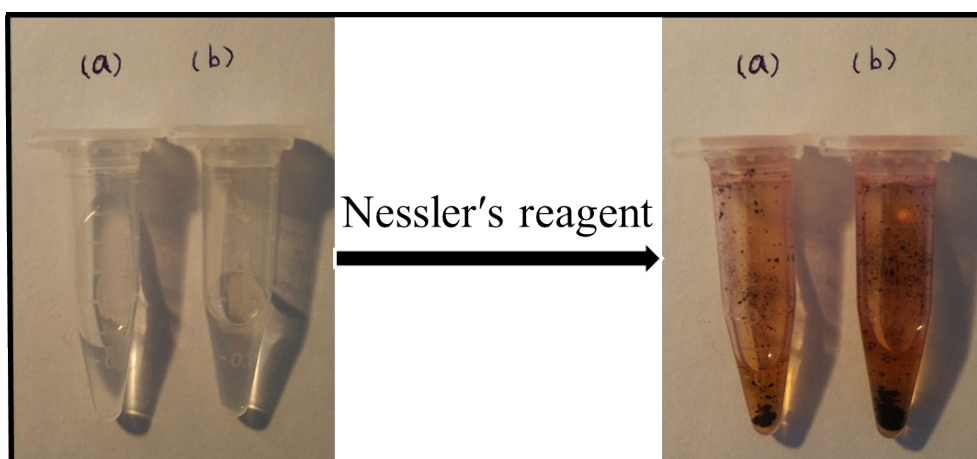

**Fig. S17.** Photographs of the products after calcining sample **0** at different atmospheres (left) before and (right) after the addition of Nessler's reagent. (a)N<sub>2</sub>; (b)Ar.

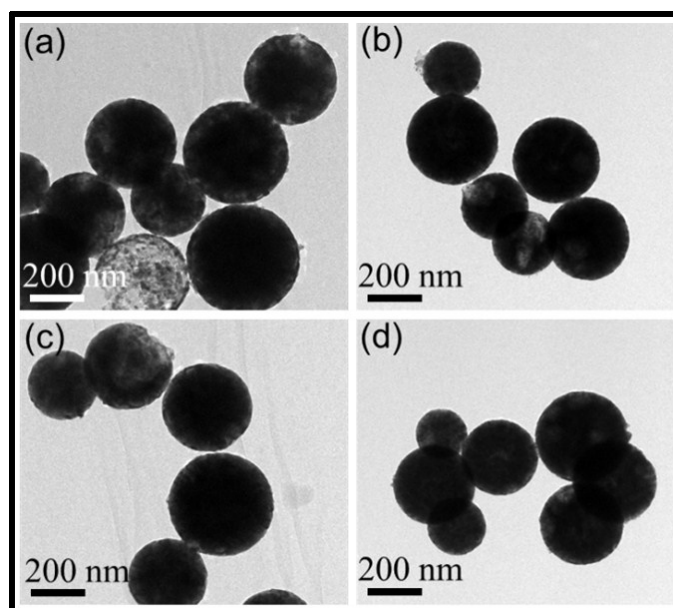

**Fig. S18.** TEM photos of the products obtained by calcining sample **0** at different atmospheres and then calcining in air. (a, c)  $N_2$ ; (b, d) Ar.

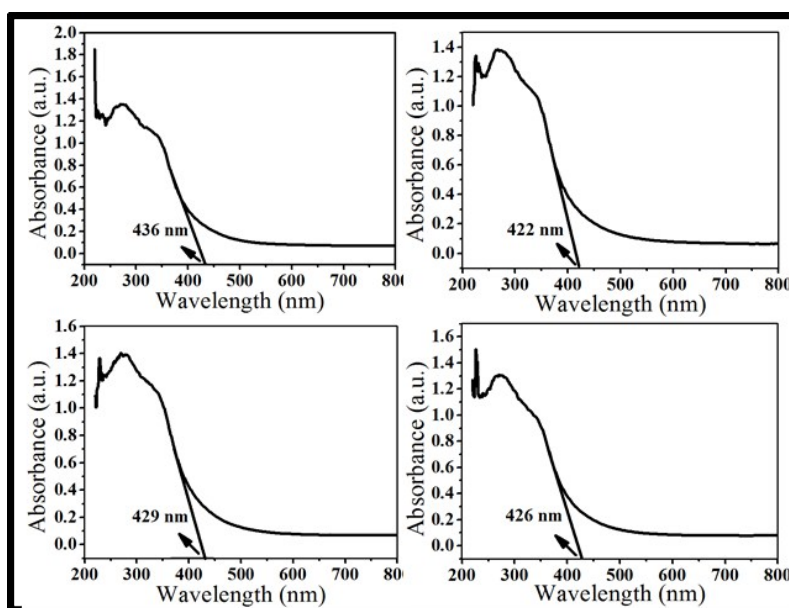

**Fig. S19.** UV-vis spectrum of the samples. (a) sample **1** (tri-shelled hollow spheres), (b) sample **5** (majorly composed of solid spheres), (c) sample **8** (di-shelled hollow spheres) and (d) sample **13** (tri-shelled hollow spheres with porous surface).

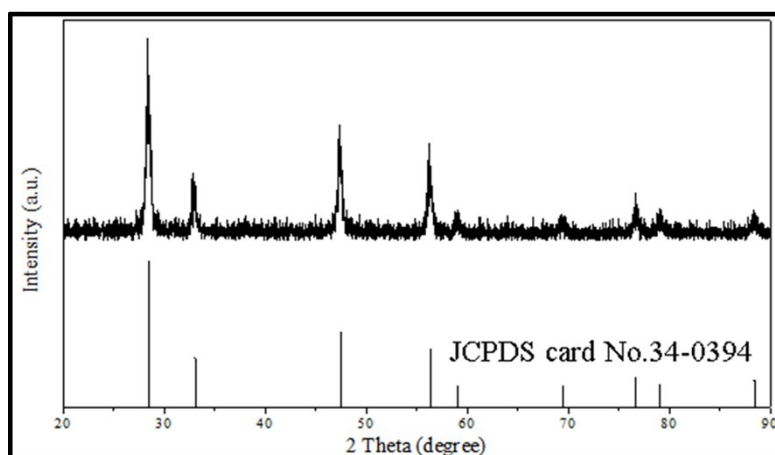

**Fig. S20.** XRD pattern of the as-prepared AuPd/CeO<sub>2</sub> multi-shelled hollow structures.

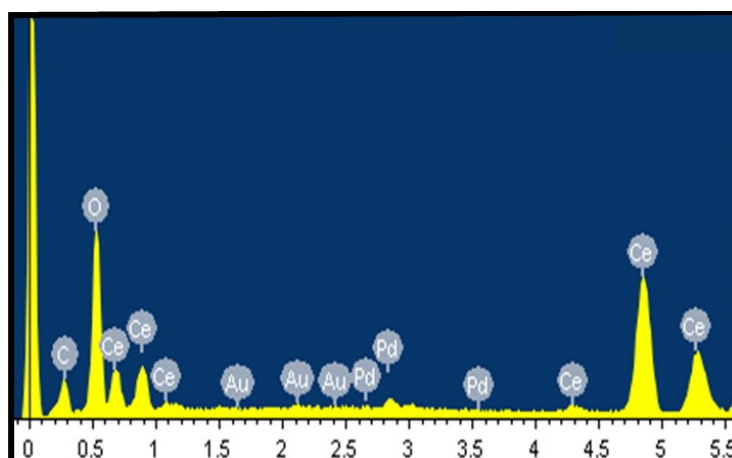

**Fig. S21.** EDX spectrum of the as-prepared AuPd/CeO<sub>2</sub> multi-shelled hollow structures
